# Supplementary material for: KH176 under development for rare mitochondrial disease: a first in man randomized controlled clinical trial in healthy male volunteers
Source: PubMed Central journal article supplement (PMC5644106; doi:10.1186/s13023-017-0715-0), 2017-10-16

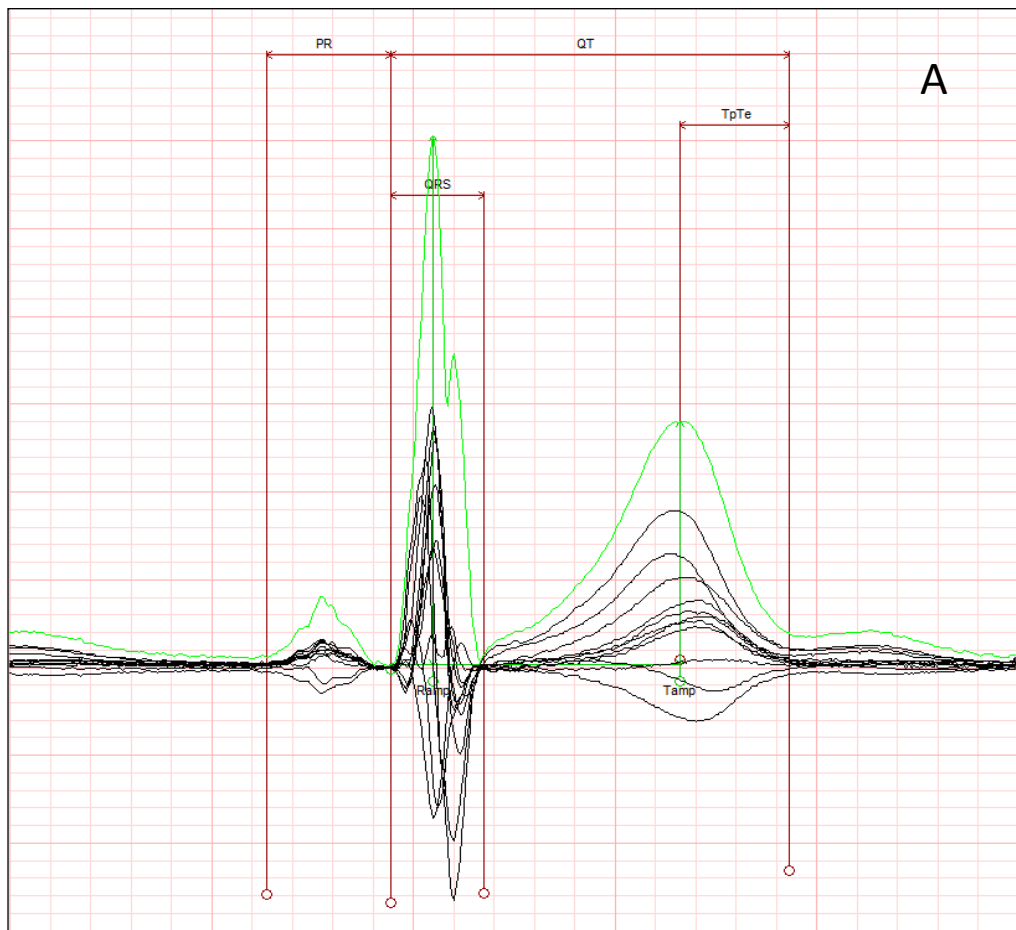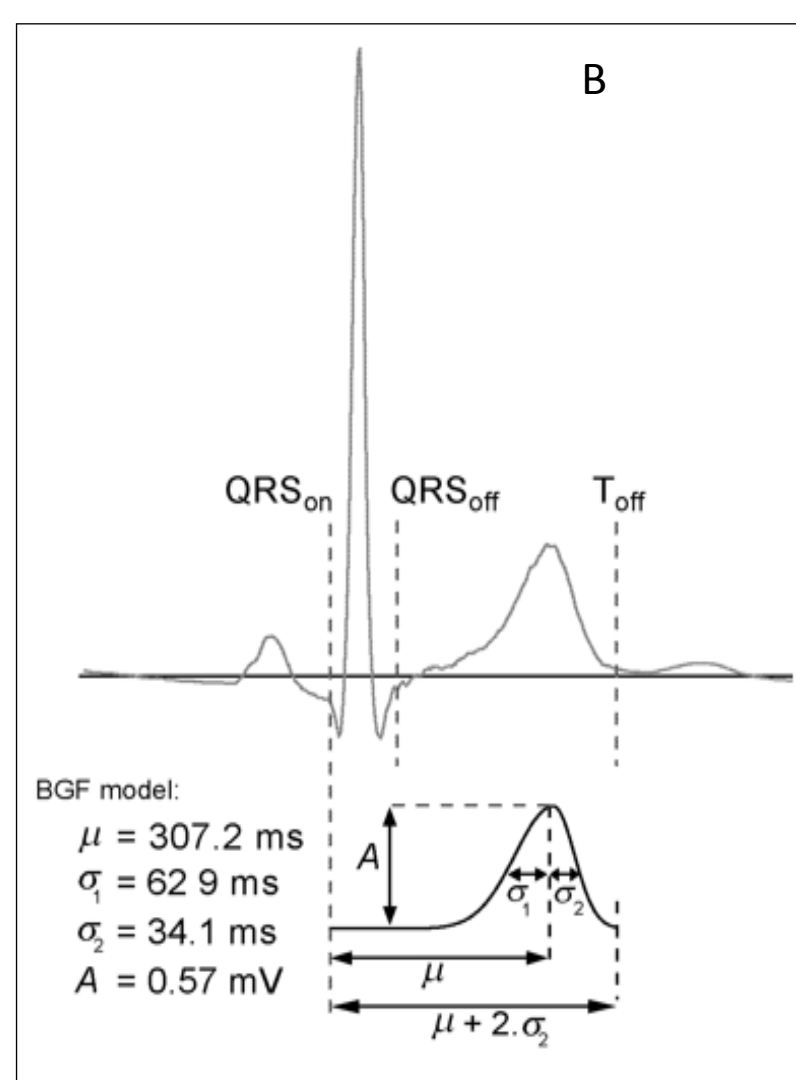

Supplement: 13023_2017_715_MOESM1_ESM.pdf [file 13023_2017_715_MOESM1_ESM.pdf]
