# Supplementary material for: KH176 under development for rare mitochondrial disease: a first in man randomized controlled clinical trial in healthy male volunteers
Source: PubMed Central journal article supplement (PMC5644106; doi:10.1186/s13023-017-0715-0), 2017-10-16

**$\Delta$ QTcf central tendency****A**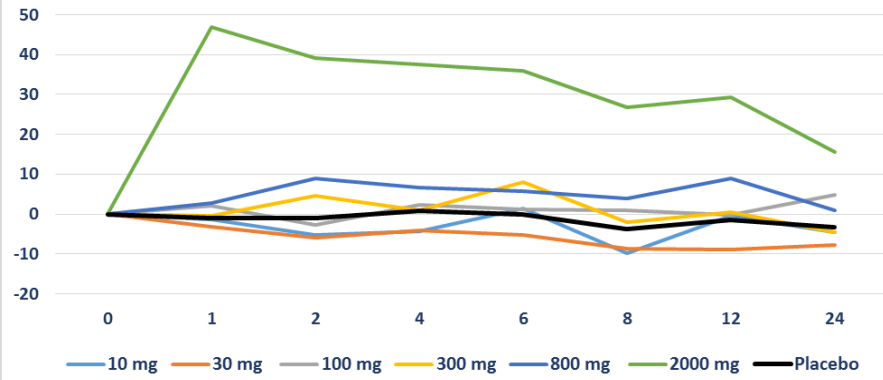 **$\Delta$ TpTe central tendency****B**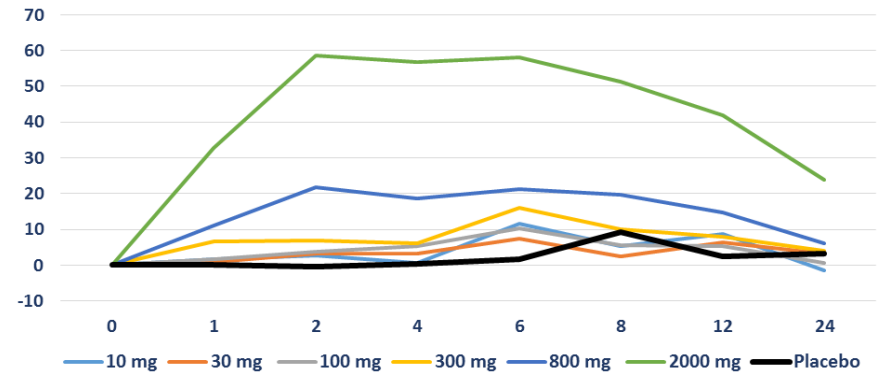 **$\Delta$ Sym central tendency****C**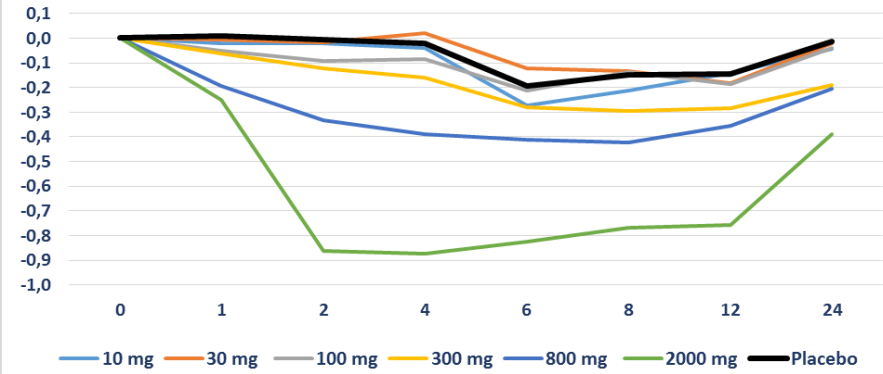 **$\Delta$ QTcf central tendency****D**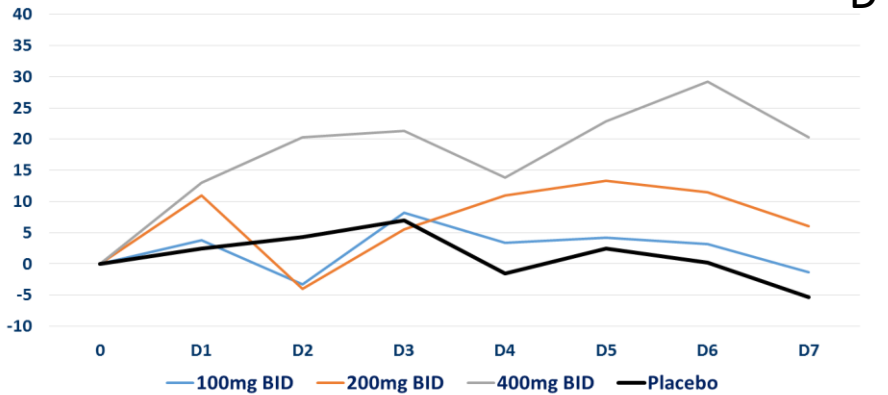 **$\Delta$ TpTe central tendency****E**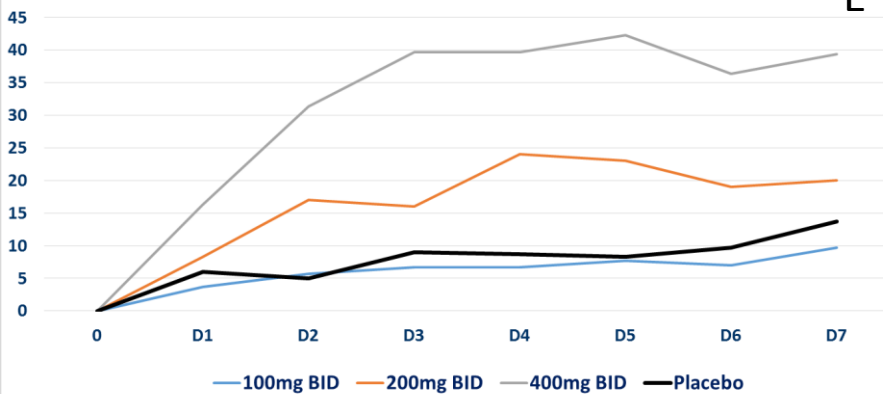 **$\Delta$ Sym central tendency****F**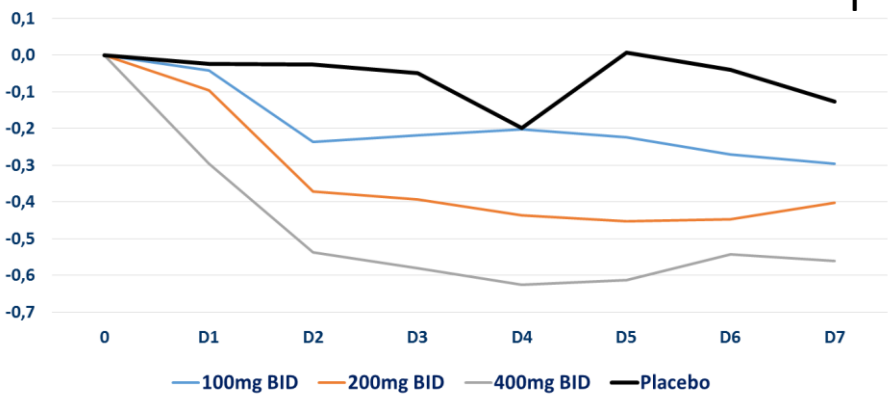

Supplement: 13023_2017_715_MOESM4_ESM.pdf [file 13023_2017_715_MOESM4_ESM.pdf]
